# Supplementary material for: Synthesis of a Dehydroabietyl Derivative Bearing a 2-(2′-Hydroxyphenyl)Benzimidazole Unit and Its Selective Cu2+ Chemosensing
Source: Molecules. 2010 Dec 28;16(1):100–6. doi: 10.3390/molecules16010100 (PMC6259128; doi:10.3390/molecules16010100)
Supplement: Supplementary file 1 [file molecules-16-00100-s001.pdf]

## (1) The $^1\text{H}$ NMR spectra of compound 2

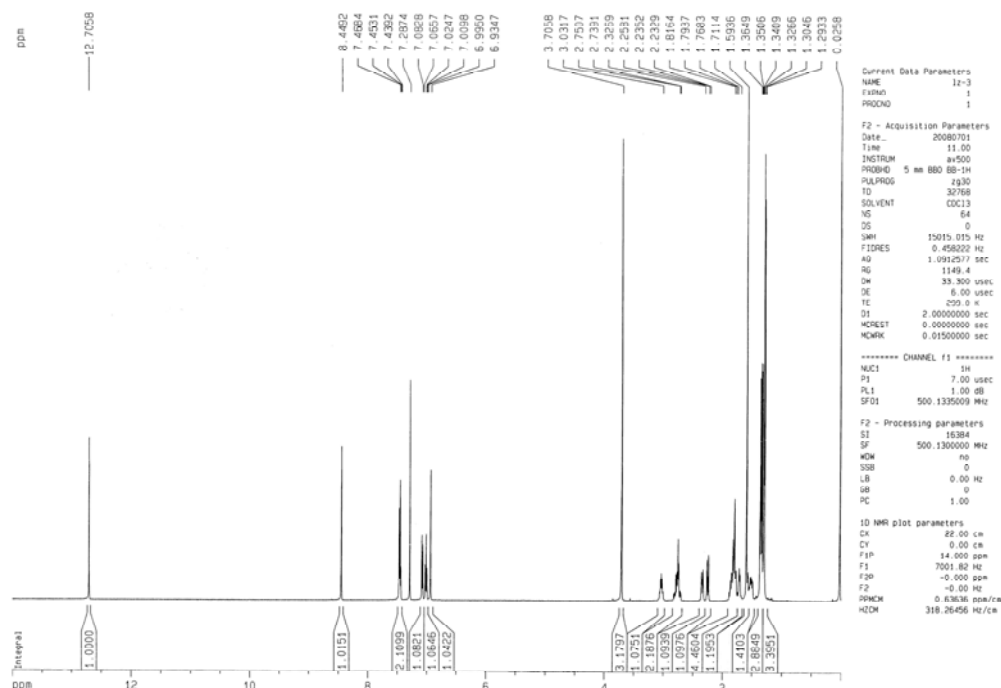

## (2) The $^{13}\text{C}$ NMR spectra of compound 2

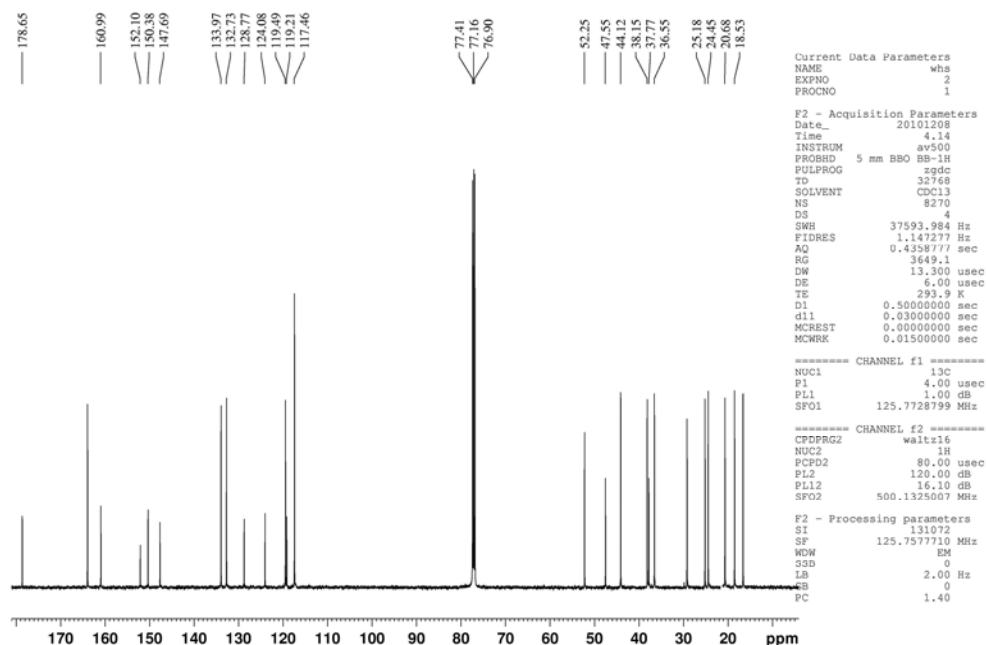

### (3) The Mass spectra of compound 2

#### Mass Spectrum List Report

##### Analysis Info

Analysis Name D:\Data\wanghengshan\101207\101207-482-01.d  
Method APCI\_POS\_LOW.m  
Sample Name Dummy  
Comment

Operator hct  
Instrument HCT

##### Acquisition Parameter

|                   |              |              |           |                          |          |
|-------------------|--------------|--------------|-----------|--------------------------|----------|
| Ion Source Type   | APCI         | Ion Polarity | Positive  | Alternating Ion Polarity | off      |
| Mass Range Mode   | Std/Enhanced | Scan Begin   | 50 m/z    | Scan End                 | 1000 m/z |
| Capillary Exit    | 166.0 Volt   | Skimmer      | 40.0 Volt | Trap Drive               | 90.7     |
| Accumulation Time | 45 $\mu$ s   | Averages     | 8 Spectra | Auto MS/MS               | off      |

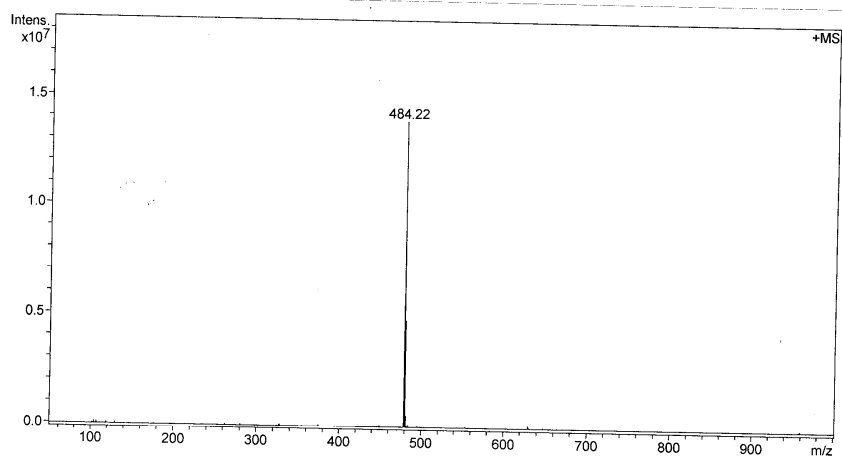

| #  | m/z    | I        | I %   |
|----|--------|----------|-------|
| 1  | 104.62 | 104592   | 0.8   |
| 2  | 107.72 | 113057   | 0.8   |
| 3  | 119.75 | 75863    | 0.5   |
| 4  | 449.21 | 87463    | 0.6   |
| 5  | 484.22 | 13896395 | 100.0 |
| 6  | 485.23 | 4826552  | 34.7  |
| 7  | 486.16 | 532974   | 3.8   |
| 8  | 486.32 | 418894   | 3.0   |
| 9  | 488.95 | 118851   | 0.9   |
| 10 | 633.33 | 138180   | 1.0   |
